# Supplementary material for: Genetic architecture and major genes for backfat thickness in pig lines of diverse genetic backgrounds
Source: PubMed Central journal article supplement (PMC8459476; doi:10.1186/s12711-021-00671-w), 2021-09-22
Supplement: 12711_2021_671_MOESM1_ESM.pdf [file 12711_2021_671_MOESM1_ESM.pdf]

## Additional file 1

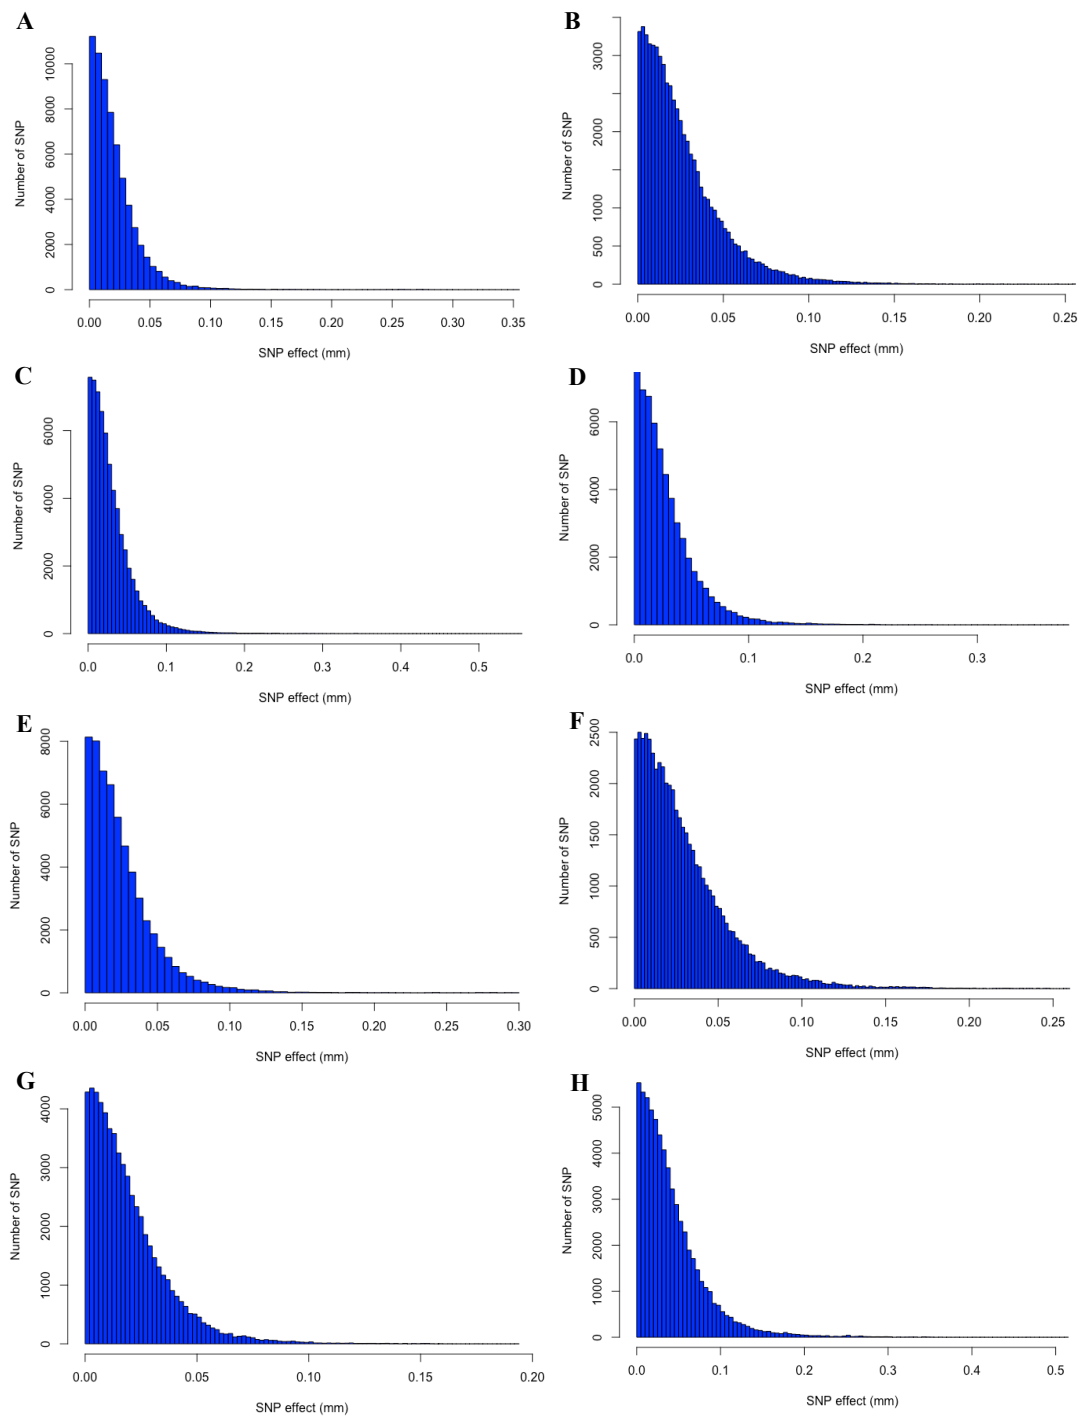

**Figure S1.** Distribution of the SNP effects on backfat thickness (mm) in the eight pig lines.

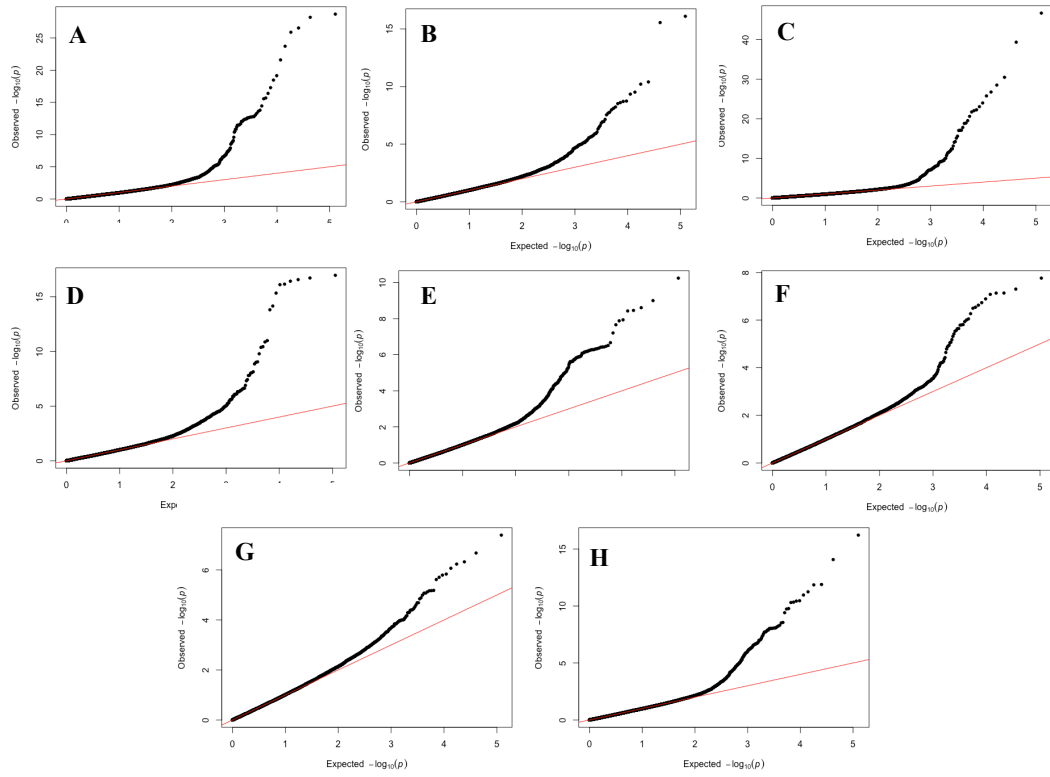

**Figure S2.** Q-Q plots for the genome-wide association study of backfat thickness for the eight pig lines.
